# Supplementary material for: Residual Temperature Bias Effects in LIMS Stratospheric Ozone and Water Vapor
Source: Copernicus journal article supplement (doi:10.5194/amt-2020-322), 2020-10-26
Supplement: Supplementary file 1 [file amt-2020-322-supplement.pdf]

1 **Supplemental materials**

2

3 Figures S1 to S3 show the LIMS monthly ascending (A) minus descending (D) plots of  
4 temperature (K) and ozone (%) for November, January, and May. They are analogous to Figures  
5 4 and 6 for March of the accompanying note.

6

7 Figure S1—November

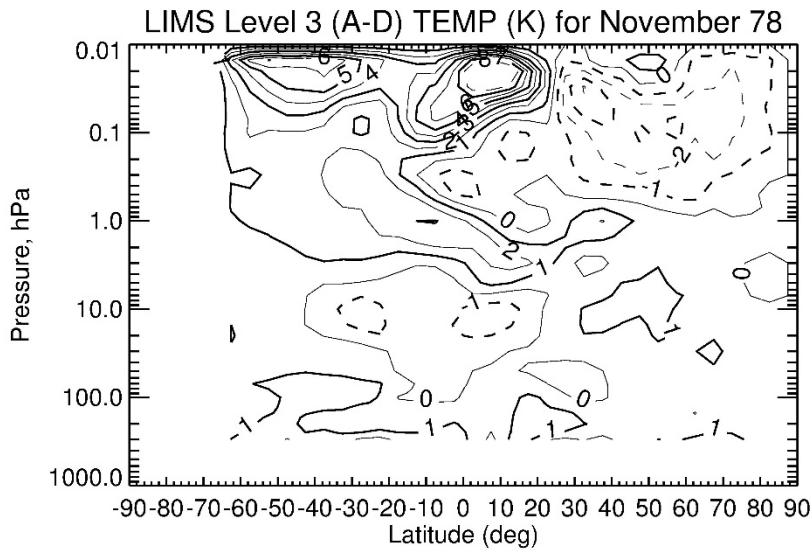

8

9

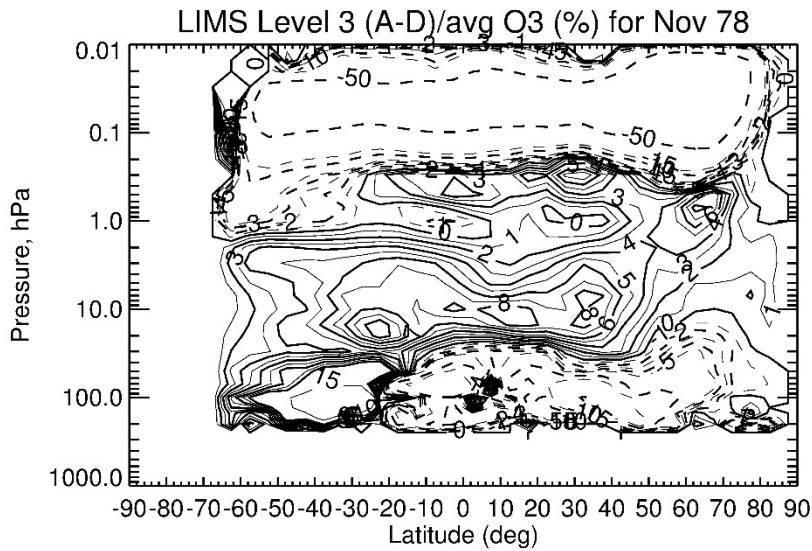

10

11

12

13 Figure S2—January

14

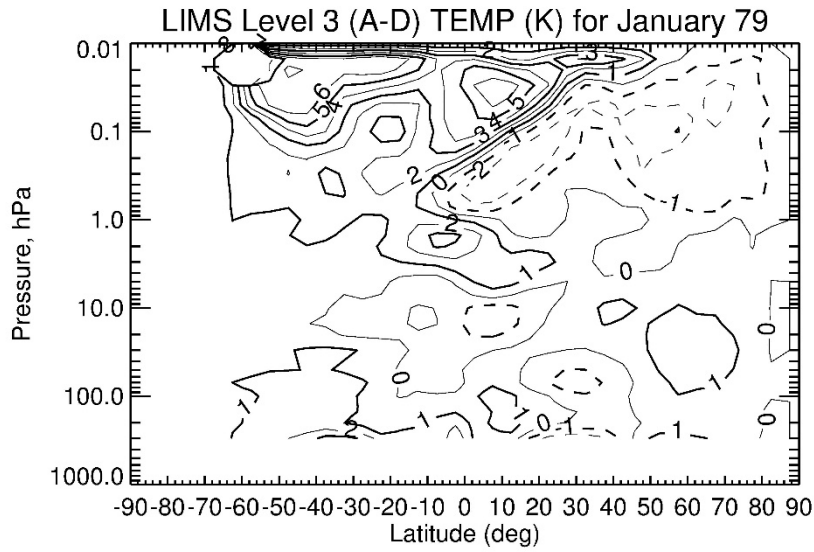

15

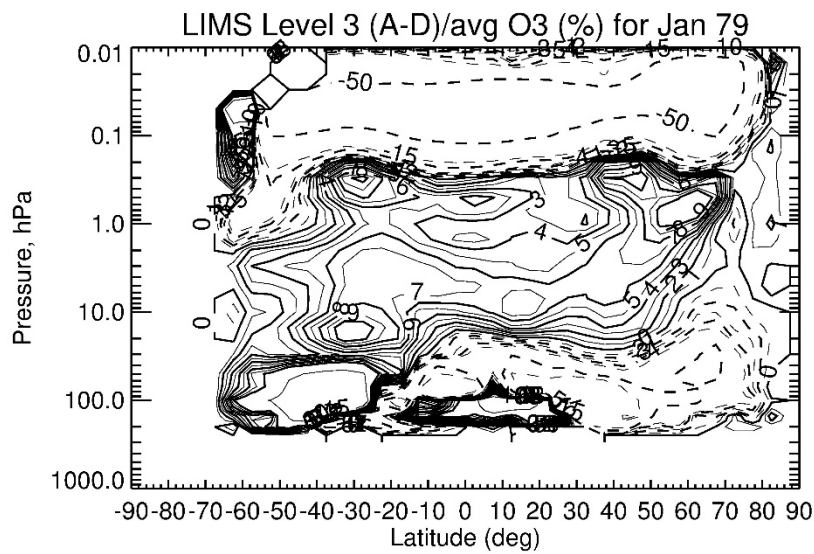

16

17

18

19 Figure S3—May

20

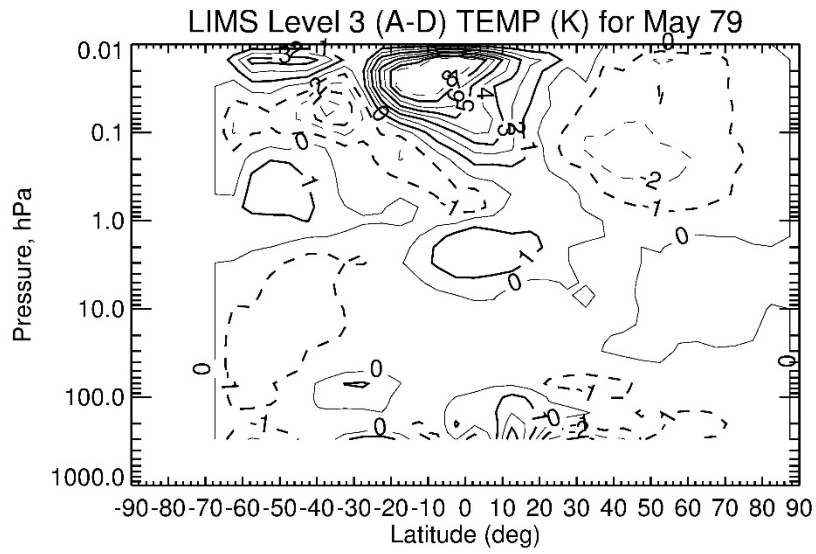

21

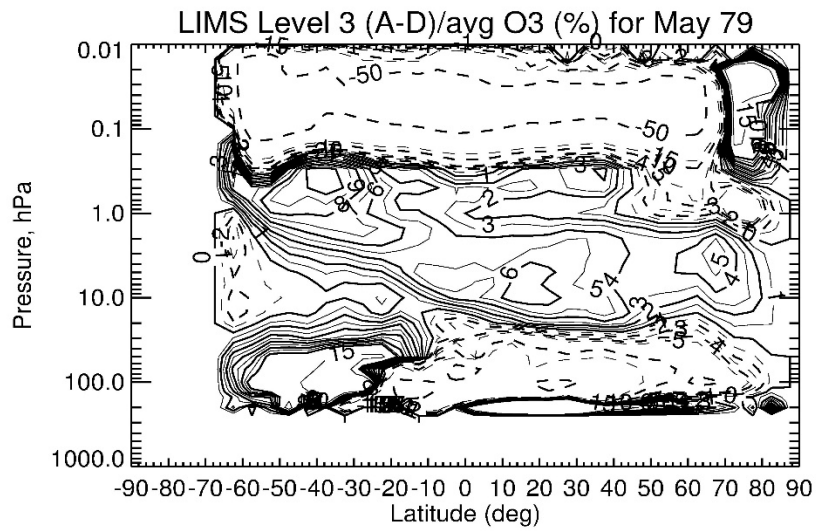

22

23
